# Supplementary material
Source: PubMed Central journal article supplement (PMC3035516)

**Fig. S1.** *Pulse-chase analysis of apoB100.* The cells were pulse-labeled with [<sup>35</sup>S]methionine/cysteine for 30 min, and chased for 1 and 2 h. Both pulse and chase media contained 20% FBS and 0.4 mM oleate. The [<sup>35</sup>S]apoB-100 was recovered from cell and medium samples by immunoprecipitation, and subjected to SDS-PAGE. Representative fluorograms of [<sup>35</sup>S]apoB-100 during chase are shown on top panels. Quantification of radioactivities associated with [<sup>35</sup>S]apoB-100 was achieved by scintillation counting (bottom panels).

<sup>35</sup>S-B-100, media

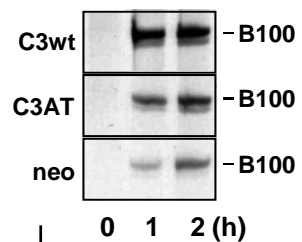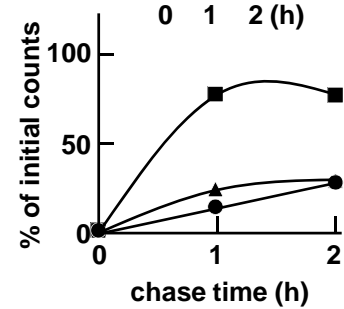

<sup>35</sup>S-B-100, cell

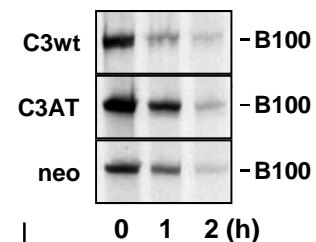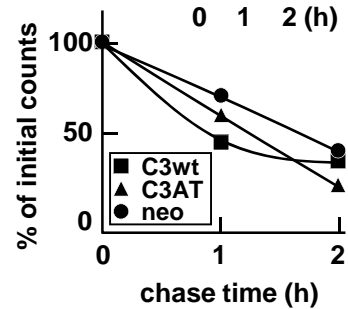

Supplement: supp_M005108_jlr.M005108-1.pdf [file supp_M005108_jlr.M005108-1.pdf]
